# Supplementary material for: What to Expect of Feeding Abilities and Nutritional Aspects in Achondroplasia Patients: A Narrative Review
Source: MDPI journal article supplement (doi:10.3390/genes14010199), 2023-01-12
Supplement: s1 [file s1]

Table S1. Narrative Review Checklist

| Section/topic             | # | Checklist item                                                                                                                                                                                                                                                                       | Reported on page or line # |
|---------------------------|---|--------------------------------------------------------------------------------------------------------------------------------------------------------------------------------------------------------------------------------------------------------------------------------------|----------------------------|
| <b>TITLE</b>              |   |                                                                                                                                                                                                                                                                                      |                            |
| Title                     | 1 | Identify the report as a Narrative Review of ...                                                                                                                                                                                                                                     | p. 1                       |
| <b>ABSTRACT</b>           |   |                                                                                                                                                                                                                                                                                      |                            |
| Unstructured summary      | 2 | Provide an unstructured summary including, as applicable: background, objective, brief summary of narrative review and implications for future research, and clinical practice or policy development.                                                                                | p.1                        |
| <b>INTRODUCTION</b>       |   |                                                                                                                                                                                                                                                                                      |                            |
| Rationale/background      | 3 | Describe the rationale for the review in the context of what is already known.                                                                                                                                                                                                       | p. 1-2                     |
| Objectives                | 4 | Specify the key question(s) identified for the review topic.                                                                                                                                                                                                                         | p.2                        |
| <b>METHODS</b>            |   |                                                                                                                                                                                                                                                                                      |                            |
| Research selection        | 5 | Specify the process for identifying the literature search (eg, years considered, language, publication status, study design, and databases of coverage).                                                                                                                             | p.2 and table 1            |
| <b>DISCUSSION/SUMMARY</b> |   |                                                                                                                                                                                                                                                                                      |                            |
| Narrative                 | 6 | Discuss: 1) research reviewed including fundamental or key findings, 2) limitations and/or quality of research reviewed, and 3) need for future research.                                                                                                                            | p-2-8                      |
| Summary                   | 7 | Provide an overall interpretation of the narrative review in the context of clinical practice and/or the Nutrition Care Process for registered dietitian nutritionists, clinical practice for other health professionals, policy development and implementation, or future research. | p.8                        |
